# Supplementary material
Source: Elsevier journal article supplement (https://www.sciencedirect.com/science/article/pii/S1888441519300074)
Supplement: mmc1 [file S1888441519300074:mmc1.docx]

**Anexo. Tablas**

Tabla 1: Características generales de la muestra de pacientes con *“dedo en resorte”* intervenidos quirúrgicamente en nuestro centro (n=298)

| Pacientes con *“dedo en resorte”* intervenido quirúrgicamente (n=298) | |
| --- | --- |
| Edad media | 48,45 +/- 9,01 (rango 22-62) |
| Sexo (mujer/varón) | 165 (59,1%) / 114 (40,9%) |
| Dedos en resorte intervenidos | 368 |
| Mano dominante | 217 (77,8%) |
| Bilateralidad | 23 (8,2%) |
| Diabetes Mellitus | 21 (7,5%) |
| Hipotiroidismo | 14 (5%) |
| Hipertiroidismo | 1 (0,3%) |
| STC | 55 (19,7%) |
| Epicondilalgia | 16 (5,7%) |
| Enfermedad De Quervain | 4 (5%) |
| Enfermedad Dupuytren | 2 (0,7%) |
| Artritis Reumatoide | 1 (0,3%) |
| Profesión manual demandante | 254 (91%) |
| Traumatismo previo | 80 (28,7%) |
| Recidivas | 15 (5,4%) |

Tabla 2: Diferencias en cuanto a características demográficas y potenciales factores relacionados entre pacientes con uno o múltiples dedos en resorte.

| ***Factores*** | **DR múltiple** | **DR único** | *p* |
| --- | --- | --- | --- |
| Edad | 49,53 +/- 7,74 | 48,16 +/- 9,32 | 0,302 |
| Sexo femenino | 40 (67,8%) | 125 (56,8%) | E |
| **STC** | **19 (32,2%)** | **36 (16,4%)** | **0,007** |
| Hipotiroidismo | 5 (8,5%) | 9 (4,1%) | 0,171 |
| **Diabetes Mellitus** | **12 (20,3%)** | **9 (4,1%)** | **<0,01** |
| Epicondilalgia | 4 (6,8%) | 2 (5,5%) | 0,753 |
| De Quervain | 5 (8,5%) | 9 (4,1%) | 0,171 |
| Dupuytren | 0 (0%) | 2 (0,9%) | 1 |
| Profesión manual | 53 (89,8%) | 201 (1,4%) | 0,714 |
| **Mano dominante** | **55 (93,2%)** | **162 (73,6%)** | **<0,01** |
| Traumatismo previo | 11 (18,6%) | 69 (31,4%) | 0,055 |

DR: dedo en resorte

Tabla 3: Análisis de regresión logística multivariante de los potenciales factores de asociación y la existencia de dedos en resorte múltiples.

|  |  | **DR múltiple** | | |  | |
| --- | --- | --- | --- | --- | --- | --- |
|  | | **Univariante** | | **Multivariante** | | |
|  | | OR (IC 95%) | *valor-p* | OR (IC 95%) | | *Valor p* |
| Edad | | 1,018 (0,984-1,052) | 0,301 | 1,013 (0,978-1,05) | | 0,461 |
| Sexo | | 1,6 (0,871-2,938) | 0,13 | 1,336 (0,698-2,56) | | 0,382 |
| STC | | **2,428 (1,264-4,662)** | **0,008** | **2,089 (1,045-4,174)** | | **0,037** |
| Diabetes Mellitus | | **5,986 (2,385-15,024)** | **<0,01** | **4,979 (1,908-12,994)** | | **0,001** |
| Mano dominante | | **4,923 (1,708-14,186)** | **0,003** | **3,759 (1,274-11,093)** | | **0,016** |

Tabla 4: Comparativa de prevalencias de Diabetes Mellitus, hipotiroidismo y Síndrome del Túnel Carpiano (STC) entre la muestra de pacientes afectos de dedo en resorte y la teórica poblacional.

| **Asociación muestra/población** | **Prevalencia en la muestra n=279**  **Edad media 48,45 años**  **(rango 22-62 años)** | *Prevalencia teórica poblacional (mismo rango de edad)* |
| --- | --- | --- |
| Diabetes mellitus | 7,53% | 6-6,5% |
| Hipotiroidismo | 5% | 3-4% |
| **STC** | **19,7%** | **2-4%** |
